# Supplementary material for: Zn3V2O8 hexagon nanosheets: a high-performance anode material for lithium-ion batteries
Source: Royal Society of Chemistry journal article supplement (doi:10.1039/c3ta14242f), 2013-12-16
Supplement: c3ta14242f.pdf [file c3ta14242f.pdf]

## Supporting Information

### **Zn<sub>3</sub>V<sub>2</sub>O<sub>8</sub> hexagon nanosheets: a high-performance anode material for lithium-ion batteries**

#### Contents

Experimental Section: The synthesis of Zn<sub>3</sub>V<sub>2</sub>O<sub>8</sub> nanoparticles.

**Figure S1.** TG analysis of Zn<sub>3</sub>V<sub>2</sub>O<sub>7</sub>(OH)<sub>2</sub>·2H<sub>2</sub>O.

**Figure S2.** XPS images of Zn2p<sub>3/2</sub>, (A) as-prepared; (B) discharge down to 0.01V

**Figure S3.** XPS images of V2p<sub>3/2</sub>, (A) as-prepared; (B) discharge down to 0.01V

**Figure S4.** (A) the crystal structure of Zn<sub>3</sub>V<sub>2</sub>O<sub>8</sub>, perspective views from (B)a, (C)b, (D)c planes, respectively, (E)a planes of 4×4×4 supercell.

**Figure S5.** XRD patterns of Zn<sub>3</sub>V<sub>2</sub>O<sub>8</sub> nanoparticles.

**Figure S6.** The SEM image of Zn<sub>3</sub>V<sub>2</sub>O<sub>8</sub> nanoparticles.

**Figure S7.** Nitrogen adsorption and desorption isotherms of Zn<sub>3</sub>V<sub>2</sub>O<sub>8</sub> hexagon nanosheets, with the corresponding pore-size distribution (inset) calculated by the BJH method from the desorption branch.

**Figure S8.** Nitrogen adsorption and desorption isotherms of Zn<sub>3</sub>V<sub>2</sub>O<sub>8</sub> nanoparticles, with the corresponding pore-size distribution (inset) calculated by the BJH method from the desorption branch.

**Figure S9.** The SEM image of Zn<sub>3</sub>V<sub>2</sub>O<sub>8</sub> nanosheets electrode after 150 charge/discharge cycles.

### Experimental Section:

#### Synthesis of $\text{Zn}_3\text{V}_2\text{O}_8$ nanoparticle

All chemicals used were analytic grade reagents used without further purification. In a typical process, 0.75mmol  $\text{ZnAc}_2$  and 0.5mmol  $\text{NH}_4\text{VO}_3$  were grinding evenly at room temperature in air. At last the powder was calcined at  $600^\circ\text{C}$  in air for 12 h to yield the final products.

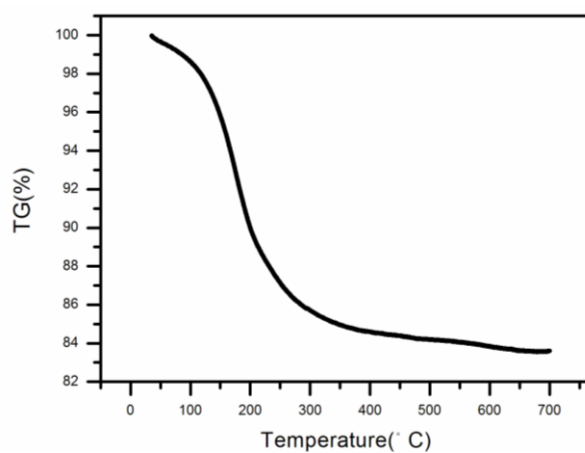

Figure S1. TG analysis of  $\text{Zn}_3\text{V}_2\text{O}_7(\text{OH})_2\cdot 2\text{H}_2\text{O}$ .

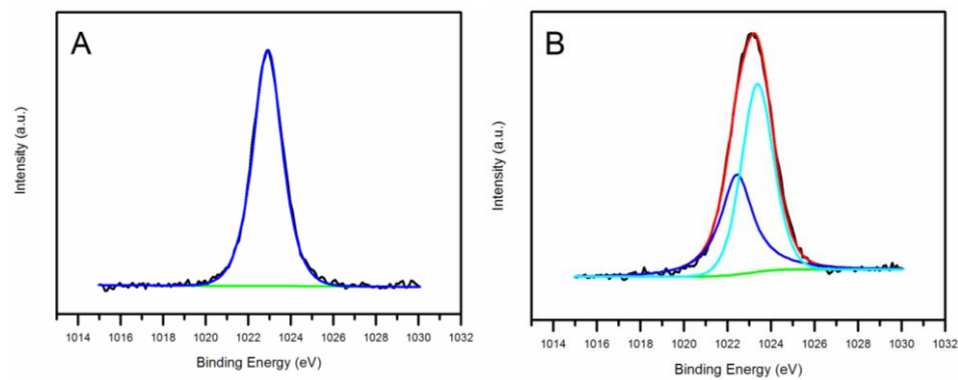

Figure S2. XPS images of  $\text{Zn}2p_{3/2}$ , (A) as-prepared; (B) discharge down to 0.01V

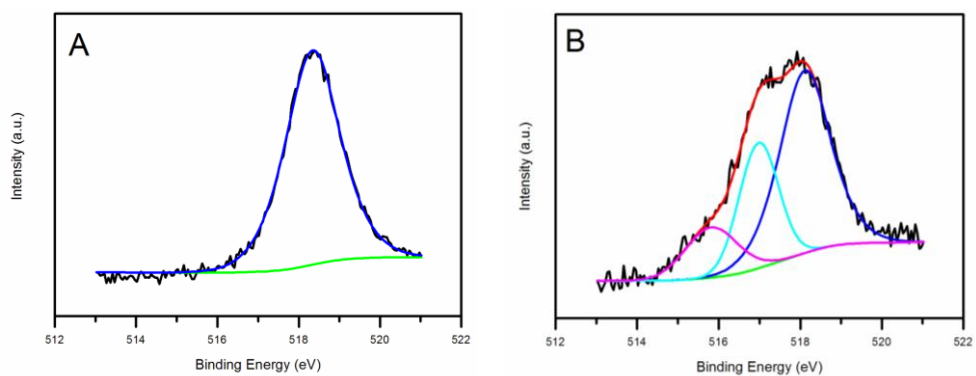

**Figure S3.** XPS images of  $V2p_{3/2}$ , (A) as-prepared; (B) discharge down to 0.01 V

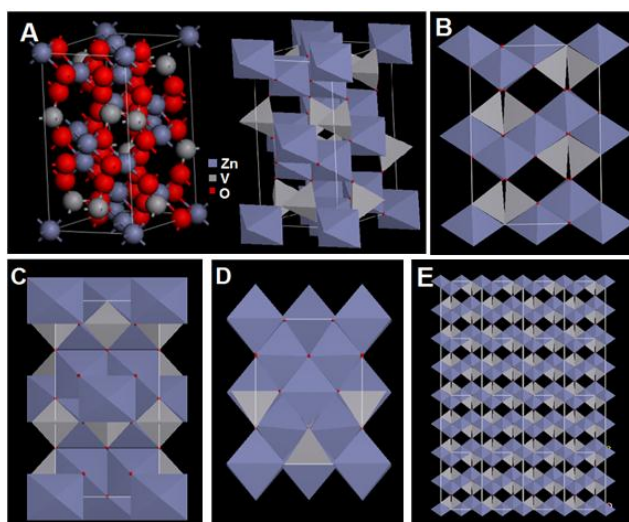

**Figure S4.** (A) the crystal structure of  $Zn_3V_2O_8$ , perspective views from (B)a, (C)b, (D)c planes, respectively, (E)a planes of  $4 \times 4 \times 4$  supercell.

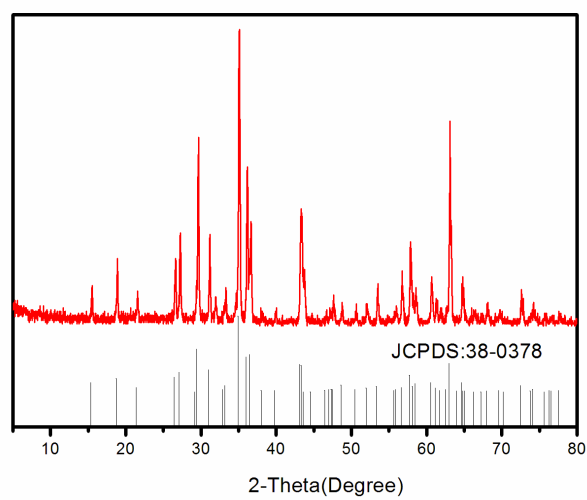

**Figure S5.** XRD patterns of Zn<sub>3</sub>V<sub>2</sub>O<sub>8</sub> nanoparticles.

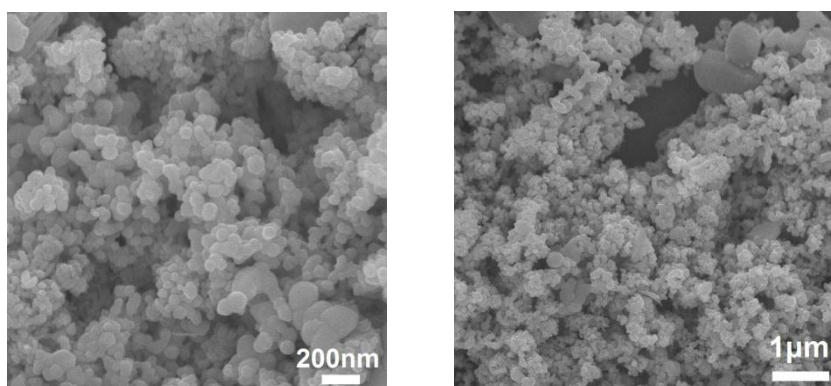

**Figure S6.** The SEM image of Zn<sub>3</sub>V<sub>2</sub>O<sub>8</sub> nanoparticles.

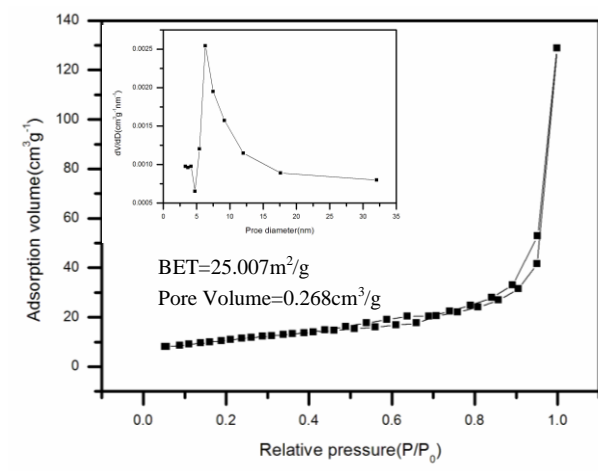

**Figure S7.** Nitrogen adsorption and desorption isotherms of  $\text{Zn}_3\text{V}_2\text{O}_8$  hexagon nanosheets, with the corresponding pore-size distribution (inset) calculated by the BJH method from the desorption branch.

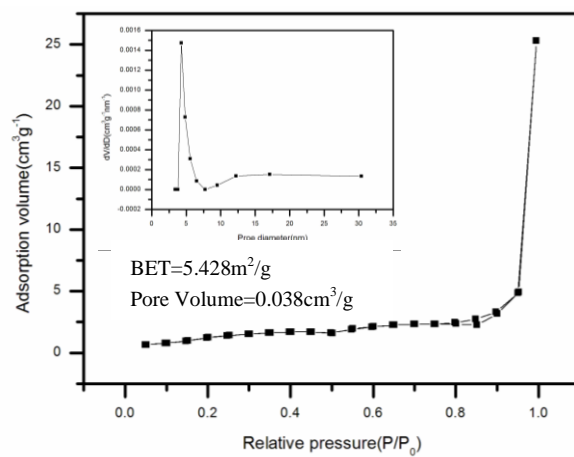

**Figure S8.** Nitrogen adsorption and desorption isotherms of  $\text{Zn}_3\text{V}_2\text{O}_8$  nanoparticles, with the corresponding pore-size distribution (inset) calculated by the BJH method from the desorption branch.

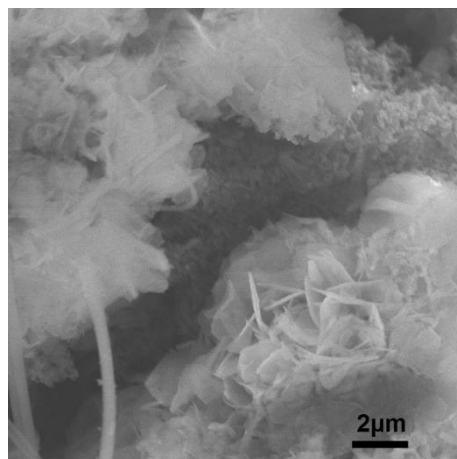

**Figure S9.** The SEM image of Zn<sub>3</sub>V<sub>2</sub>O<sub>8</sub> nanosheets electrode after 150 charge/discharge cycles.
